# Supplementary material
Source: publisher figshare collection journal article supplement (https://rs.figshare.com/ndownloader/files/17889500)
Supplement: Supplementary file 1 [file 17889500]

# Supplementary Material for Proc. R. Soc. A 20190220 — Homogenization of plasmonic crystals: Seeking the epsilon-near-zero effect

by M. Maier, M. Mattheakis, E. Kaxiras, M. Luskin, and D. Margetis

The supplementary material contains a derivation of compatibility conditions (2.3) from Gauss' and Ampère's law (Section SM1), a derivation of all interface and internal boundary conditions starting from a weak formulation of the problem (Section SM2).

## SM1. Derivation of compatibility conditions from Gauss' and Ampère's law

In this section, we give a short derivation of the internal compatibility condition (2.3).

For an arbitrary volume  $V$  in  $\Omega$ , the integral over the *electric displacement in normal direction* has to be equal to the integral over the total charge density contained in  $V$ ,

$$i\omega \int_V \rho \, dx = \int_{\partial V} \mathbf{n}_{\partial V} \cdot (\varepsilon^d \mathbf{E}^d) \, do_x.$$

We now choose  $V$  to be an arbitrary rectangular box containing a part of the edge  $\partial\Sigma^d$ . We extend the sheet over the edge parallel in  $\mathbf{n}$ -direction, and assume  $\sigma^d = 0$  in the extension. The box shall be of vanishing length and height, and with top and bottom faces parallel to the extended sheet  $\Sigma_*^d$ ; see Figure 1. Then,

$$\begin{aligned} \lim_{\text{height} \rightarrow 0} i\omega \int_V \rho \, dx &= \lim_{\text{height} \rightarrow 0} \int_{\partial V} \mathbf{n}_{\partial V} \cdot (\varepsilon^d \mathbf{E}^d) \, do_x \\ &= \lim_{\text{height} \rightarrow 0} \int_{\text{top}} \boldsymbol{\nu} \cdot (\varepsilon^d \mathbf{E}^d)^{\text{above}} \, do_x - \int_{\text{bottom}} \boldsymbol{\nu} \cdot (\varepsilon^d \mathbf{E}^d)^{\text{below}} \, do_x \\ &= + \int_{V \cap \Sigma_*^d} \boldsymbol{\nu} \cdot (\varepsilon^d \mathbf{E}^d)^{\text{above}} \, do_x - \int_{V \cap \Sigma_*^d} \boldsymbol{\nu} \cdot (\varepsilon^d \mathbf{E}^d)^{\text{below}} \, do_x. \end{aligned}$$

Here,  $\mathbf{n}_{\partial V}$  denotes the outward pointing unit normal on faces of the volume  $V$  and  $\boldsymbol{\nu}$  is the normal field on  $\Sigma_*^d$ . Now, utilizing the third jump condition in (2.2) we conclude that

$$\begin{aligned} \lim_{\text{height} \rightarrow 0} i\omega \int_V \rho \, dx &= \int_{V \cap \Sigma_*^d} [\boldsymbol{\nu} \cdot (\varepsilon^d \mathbf{E}^d)]_{\Sigma^d} \, do_x \\ &= \int_{V \cap \Sigma_*^d} \nabla \cdot (\sigma^d \mathbf{E}^d) \, do_x \\ &= \int_{\partial V \cap \Sigma_*^d} \mathbf{n} \cdot (\sigma^d \mathbf{E}^d) \, do_x. \end{aligned}$$

Here,  $\mathbf{n}$  is the outward pointing normal on the edge, see Figure 1. By keeping the width (dimension parallel to the edge  $\partial\Sigma^d$ ) fixed and in the limit of vanishing height and length, we conclude that the volume integral over the charge density  $\rho$  reduces to

$$\lim_{\text{height} \rightarrow 0} \lim_{\text{length} \rightarrow 0} i\omega \int_V \rho \, dx = \int_{V \cap \partial\Sigma^d} \nabla \cdot (\lambda^d(\mathbf{x}) \mathbf{E}^d(\mathbf{x})) \, ds.$$

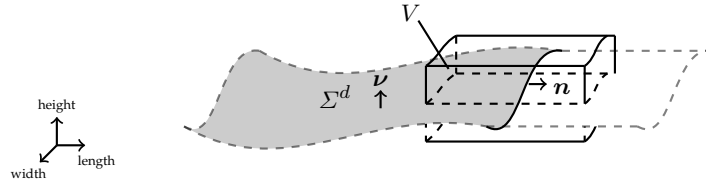

Figure 1: Choice of rectangular box  $V$ ; a curved, rectangular box containing a part of the edge  $\partial\Sigma^d$ . We extend the sheet over the edge parallel in  $\mathbf{n}$ -direction, and assume  $\sigma^d = 0$  in the extension. The box shall be of vanishing length and height, and with top and bottom faces parallel to the extended sheet  $\Sigma^d$ .

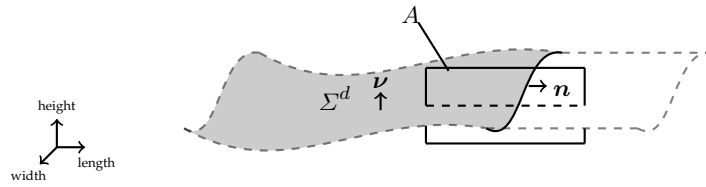

Figure 2: Choice of area element  $A$ ; a curved, rectangular rectangle enclosing a point of the edge  $\partial\Sigma^d$ . We extend the sheet over the edge parallel in  $\mathbf{n}$ -direction, and assume  $\sigma^d = 0$  in the extension. The area shall be of vanishing length and height, and with top and bottom lines parallel to the extended sheet  $\Sigma^d$ .

Consequently,

$$\int_{V \cap \partial\Sigma^d} \nabla \cdot (\lambda^d(\mathbf{x}) \mathbf{E}^d(\mathbf{x})) \, ds = \int_{V \cap \partial\Sigma^d} [\mathbf{n} \cdot (\sigma^d \mathbf{E}^d)]_{\Sigma^d} \, d\sigma_x.$$

Due to the fact that  $V$  was chosen arbitrarily, we conclude that

$$[\mathbf{n} \cdot (\sigma^d \mathbf{E}^d)]_{\Sigma^d} = \nabla \cdot (\lambda^d(\mathbf{x}) \mathbf{E}^d(\mathbf{x}))$$

has to hold true pointwise on  $\partial\Sigma^d$ . But  $\sigma^d$  vanishes outside of  $\Sigma^d$ , thus

$$\mathbf{n} \cdot (\sigma^d \mathbf{E}^d) = \nabla \cdot (\lambda^d(\mathbf{x}) \mathbf{E}^d(\mathbf{x})) \quad \text{on } \partial\Sigma^d.$$

In a similar vein, let  $A$  be an arbitrary area element perpendicular to the edge; see Figure 2. By virtue of Ampère's law we have

$$\int_{\partial A} \mathbf{H}^d \cdot d\mathbf{s} = \int_A \mathbf{J} \cdot \boldsymbol{\tau} \, d\sigma_x, \quad (\text{SM 1.1})$$

where  $\boldsymbol{\tau}$  is the unit vector in edge direction, orthogonal to  $\mathbf{n}$  and  $\boldsymbol{\nu}$ . In the limit of vanishing length, we can rewrite the left-hand side:

$$\begin{aligned} \lim_{\text{length} \rightarrow 0} \int_{\partial A} \mathbf{H}^d \cdot d\mathbf{s} &= \lim_{\text{length} \rightarrow 0} \left\{ \int_{\text{left, right}} (\mathbf{n} \times \mathbf{H}^d) \cdot \boldsymbol{\tau} \, ds + \int_{\text{top, bottom}} (\pm \boldsymbol{\nu} \times \mathbf{H}^d) \cdot \boldsymbol{\tau} \, ds \right\} \\ &= \lim_{\text{length} \rightarrow 0} \int_{\text{left, right}} (\mathbf{n} \times \mathbf{H}^d) \cdot \boldsymbol{\tau} \, ds. \end{aligned}$$

Exploiting the fact that  $\mathbf{J} = \mathbf{J}_a + \delta_{\Sigma^d} \sigma^d \mathbf{E}^d + \delta_{\partial \Sigma^d} \lambda^d \mathbf{E}^d$  and by taking the limit of vanishing length we conclude that:

$$\lambda^d \mathbf{E}^d \Big|_{\partial \Sigma^d \cap A} \cdot \boldsymbol{\tau} = \lim_{\text{length} \rightarrow 0} \int_{\text{left, right}} (\mathbf{n} \times \mathbf{H}^d) \cdot \boldsymbol{\tau} \, ds. \quad (\text{SM1.2})$$

This implies that the jump over  $\mathbf{n} \times \mathbf{H}^d$  must have a singular point contribution:

$$\left\{ \mathbf{n} \times \mathbf{H}^d \right\}_{\partial \Sigma^d} \cdot \boldsymbol{\tau} = \lambda^d \mathbf{E}^d \Big|_{\partial \Sigma^d \cap A} \cdot \boldsymbol{\tau}.$$

Here, we defined  $\{\cdot\}_{\partial \Sigma^d}$  rigorously as the corresponding limit in (SM1.2). Note that the height of the area element  $A$  was arbitrarily chosen. Indeed, the actual value of  $\left\{ \mathbf{n} \times \mathbf{H}^d \right\}_{\partial \Sigma^d}$  does not depend on the particular choice of the area element  $A$  because it corresponds directly to a residue of an analytic function  $(\mathbf{n} \times \mathbf{H}^d) \cdot \boldsymbol{\tau}$ . In this sense, Definition (2.3) is an equivalent, slightly less technical definition.

## SM2. Derivation of interface and internal boundary condition from weak formulation

In this appendix we derive the strong formulation with all jump and compatibility conditions starting from a variational formulation. The weak formulation reads, find a vector field  $\mathbf{E}$  such that

$$\begin{aligned} \int_{\Omega} \mu_0^{-1} \nabla \times \mathbf{E}^d \cdot \nabla \times \overline{\boldsymbol{\psi}} \, dx - \omega^2 \int_{\Omega} \varepsilon \mathbf{E}^d \cdot \overline{\boldsymbol{\psi}} \, dx \\ - i\omega \int_{\Sigma^d} \sigma^d \mathbf{E}^d \cdot \overline{\boldsymbol{\psi}} \, dx - i\omega \int_{\partial \Sigma^d} \lambda^d \mathbf{E}^d \cdot \overline{\boldsymbol{\psi}} \, ds = \int_{\Omega} i\omega \mathbf{J}_a \cdot \overline{\boldsymbol{\psi}} \, dx, \end{aligned} \quad (\text{SM2.1})$$

for all smooth, vector-valued test functions  $\boldsymbol{\psi}$  with compact support in  $\Omega$ . Let us now define

$$i\omega \mu_0 \int_{\Omega} \mathbf{H}^d \cdot \overline{\boldsymbol{\psi}} \, dx := \int_{\Omega} \mathbf{E}^d \cdot (\nabla \times \overline{\boldsymbol{\psi}}) \, dx. \quad (\text{SM2.2})$$

Integrating (SM2.2) by parts yields

$$i\omega \mu_0 \int_{\Omega} \mathbf{H}^d \cdot \overline{\boldsymbol{\psi}} \, dx = \int_{\Omega} (\nabla \times \mathbf{E}^d) \cdot \overline{\boldsymbol{\psi}} \, dx - \int_{\Sigma^d} [\boldsymbol{\nu} \times \mathbf{E}^d]_{\Sigma^d} \cdot \overline{\boldsymbol{\psi}} \, do_x.$$

Thus, testing with (a) a smooth, vector-valued test function  $\boldsymbol{\psi}$  with  $\boldsymbol{\psi} = 0$  on  $\Sigma^d$ , and (b) a sequence  $\boldsymbol{\psi}_h$  of test functions with vanishing support outside  $\Sigma^d$  gives

$$i\omega \mu_0 \mathbf{H}^d = \nabla \times \mathbf{E}^d \quad \text{in } \Omega \setminus \Sigma^d, \quad [\boldsymbol{\nu} \times \mathbf{E}^d]_{\Sigma^d} = 0 \quad \text{on } \Sigma^d.$$

Similarly, integration by parts of (SM2.1) and substituting  $\mathbf{H}$ :

$$\begin{aligned} i\omega \int_{\Omega} (\nabla \times \mathbf{H}^d) \cdot \overline{\boldsymbol{\psi}} \, dx - \omega^2 \int_{\Omega} \varepsilon \mathbf{E}^d \cdot \overline{\boldsymbol{\psi}} \, dx - i\omega \int_{\Omega} \mathbf{J}_a \cdot \overline{\boldsymbol{\psi}} \, dx \\ = +i\omega \int_{\Sigma^d} [\boldsymbol{\nu} \times \mathbf{H}^d]_{\Sigma^d} \cdot \overline{\boldsymbol{\psi}} \, do_x + i\omega \int_{\partial \Sigma^d} \left\{ \mathbf{n} \times \mathbf{H}^d \right\}_{\partial \Sigma^d} \cdot \overline{\boldsymbol{\psi}} \, ds \\ - i\omega \int_{\Sigma^d} \sigma^d \mathbf{E}^d \cdot \overline{\boldsymbol{\psi}} \, do_x - i\omega \int_{\partial \Sigma^d} \lambda^d \mathbf{E}^d \cdot \overline{\boldsymbol{\psi}} \, ds. \end{aligned}$$

The occurrence of the jump term over  $\partial \Sigma^d$  after the integration by parts has to be justified more precisely. Similarly, to the discussion in Appendix SM1 we assume that the function space for  $\mathbf{H}$

admits singular distributions on the edge. More precisely, we define

$$\int_{\partial\Sigma^d} \{\mathbf{n} \times \mathbf{H}\}_{\partial\Sigma^d} \cdot \boldsymbol{\psi} \, ds := \int_{\Omega} (\nabla \times \mathbf{H}) \cdot \boldsymbol{\psi} \, dx - \int_{\Omega} \mathbf{H} \cdot (\nabla \times \boldsymbol{\psi}) \, dx - \int_{\Sigma^d} [\boldsymbol{\nu} \times \mathbf{H}]_{\Sigma^d} \cdot \boldsymbol{\psi} \, do_x. \quad (\text{SM 2.3})$$

Utilizing the same sequences (a) and (b) of test functions yields a similar result:

$$\begin{aligned} \nabla \times (i\omega \mathbf{H}^d) - \omega^2 \varepsilon \mathbf{E}^d - i\omega \mathbf{J}_a &= 0 && \text{in } \Omega \setminus \Sigma^d, \\ i\omega [\boldsymbol{\nu} \times \mathbf{H}^d]_{\Sigma^d} &= i\omega \sigma^d \mathbf{E}^d && \text{on } \Sigma^d \setminus \partial\Sigma^d, \\ i\omega \{\mathbf{n} \times \mathbf{H}^d\}_{\partial\Sigma^d} &= i\omega \lambda^d \mathbf{E}^d && \text{on } \partial\Sigma^d. \end{aligned}$$

Now, let  $\varphi$  be an arbitrary scalar-valued test function with compact support and set  $\boldsymbol{\psi} = \nabla\varphi$ . And choose again (a)  $\varphi = 0$  on  $\Sigma^d$ , and (b) a sequence  $\varphi_h$  of test functions with vanishing support outside  $\Sigma^d$ . Testing (SM 2.2) and subsequent integration by parts results in

$$\nabla \cdot \mathbf{H}^d = 0 \quad \text{in } \Omega \setminus \Sigma^d, \quad [\boldsymbol{\nu} \cdot \mathbf{H}^d]_{\Sigma^d} = 0 \quad \text{on } \Sigma^d.$$

In case of the first equation we start again at (SM 2.1). Utilizing the vector identity  $\nabla \times (\nabla\varphi) = 0$ :

$$-\omega^2 \int_{\Omega} \varepsilon \mathbf{E}^d \cdot \nabla\bar{\varphi} \, dx - i\omega \int_{\Sigma^d} \sigma^d \mathbf{E}^d \cdot \nabla\bar{\varphi} \, do_x - i\omega \int_{\partial\Sigma^d} \lambda^d \mathbf{E}^d \cdot \nabla\bar{\varphi} \, ds = i\omega \int_{\Omega} \mathbf{J}_a \cdot \nabla\bar{\varphi} \, dx.$$

Integration by parts:

$$\begin{aligned} \omega^2 \int_{\Omega} \nabla \cdot (\varepsilon \mathbf{E}^d) \bar{\varphi} \, dx + i\omega \int_{\Omega} \nabla \cdot \mathbf{J}_a \bar{\varphi} \, dx \\ = -\omega^2 \int_{\Sigma^d} [\boldsymbol{\nu} \cdot (\varepsilon \mathbf{E}^d)]_{\Sigma^d} \bar{\varphi} \, do_x - i\omega \int_{\Sigma^d} \nabla \cdot (\sigma^d \mathbf{E}^d) \bar{\varphi} \, do_x \\ + i\omega \int_{\partial\Sigma^d} \mathbf{n} \cdot (\sigma^d \mathbf{E}^d) \bar{\varphi} \, ds - i\omega \int_{\partial\Sigma^d} \nabla \cdot (\lambda^d \mathbf{E}^d) \bar{\varphi} \, ds. \end{aligned}$$

Here,  $\mathbf{n}$  denotes the outward-pointing unit vector tangential to  $\Sigma^d$  and normal to  $\partial\Sigma^d$ . We point out that for the integration by parts of the interface term  $\int_{\Sigma^d} \sigma^d \mathbf{E}^d$  it is essential that  $\sigma^d$  projects onto the tangential space of  $\Sigma^d$ . We thus recover

$$\nabla \cdot (\varepsilon \mathbf{E}^d) = \frac{1}{i\omega} \nabla \cdot \mathbf{J}_a \quad \text{in } \Omega \setminus \Sigma^d, \quad [\boldsymbol{\nu} \cdot (\varepsilon \mathbf{E}^d)]_{\Sigma^d} = \frac{1}{i\omega} \nabla \cdot (\sigma^d \mathbf{E}^d) \quad \text{on } \Sigma^d,$$

and

$$\mathbf{n} \cdot (\sigma^d \mathbf{E}^d) = \nabla \cdot (\lambda^d \mathbf{E}^d) \quad \text{on } \partial\Sigma^d.$$
